# Supplementary material
Source: Springer Nature journal article supplement (https://www.springermedizin.de/resource/supplementary/13032_2009_33_MOESM1_ESM.pdf/9651488)
Supplement: MOESM1 [file 9651488]

LMU trauma room workflow guided by ABCDE priorities (Airway, Breathing, Circulation, Disability, Environment)

P  
r  
i  
m  
a  
r  
y  
  
T  
r  
a  
u  
m  
a  
  
S  
u  
r  
v  
e  
y

| PROBLEM                                                                                                                                    |
|--------------------------------------------------------------------------------------------------------------------------------------------|
| Traumatic cardio-respiratory arrest?                                                                                                       |
| Esophageal intubation?<br>Airway obstruction?<br>C-spine control?<br>Tension pneumothorax?<br>Pericardial tamponade?<br>External bleeding? |
| Respiratory distress?                                                                                                                      |
| <i>FACTT scan</i>                                                                                                                          |
| Pneumo-/ Hemothorax?<br>Hypotension?                                                                                                       |
| Critical ICP elevation?                                                                                                                    |
| Head trauma?<br>Thoracic trauma?<br>Abdominal trauma?<br>Pelvic trauma?<br>Dislocations?<br>Fractures?                                     |
| Head trauma and need for respirator therapy?                                                                                               |
| Additional findings?                                                                                                                       |
| Intracranial pathology?                                                                                                                    |
| Transfer to OR or ICU?                                                                                                                     |

| INTERVENTION                                                                                                                                                                                          |
|-------------------------------------------------------------------------------------------------------------------------------------------------------------------------------------------------------|
| Vital signs assessment                                                                                                                                                                                |
| Tube repositioning<br>Emergency intubation<br>C-spine immobilisation<br>Pleural decompression<br>Pericardial decompression<br>Direct bleeding control<br>Large caliber venous lines<br>Blood sampling |
| Emergency intubation                                                                                                                                                                                  |
| Tetanus vaccination                                                                                                                                                                                   |
| <i>FACTT scan</i>                                                                                                                                                                                     |
| Chest tubes<br>Infusions, transfusions<br>Arterial line<br>Central venous line                                                                                                                        |
| Head-to-toe examination                                                                                                                                                                               |
| Bronchoscopy                                                                                                                                                                                          |
| Foley catheter<br>Closed reduction and immobilisation                                                                                                                                                 |

| IMAGING                              |
|--------------------------------------|
| FAST                                 |
| Chest radiograph                     |
| <i>FACTT</i>                         |
| <i>FACTT</i> assessment              |
| MPR assessment                       |
| Cysturethrography                    |
| Specific imaging                     |
| CCT repetition<br>60 min after FACCT |
| FAST before transfer                 |

| SURGERY                                                                                                                                                    |
|------------------------------------------------------------------------------------------------------------------------------------------------------------|
| Resuscitative thoracotomy                                                                                                                                  |
| Surgical airway                                                                                                                                            |
| Surgical bleeding control                                                                                                                                  |
| <i>FACTT scan</i>                                                                                                                                          |
| Emergency thoracotomy<br>Aortic balloon occlusion<br>Emergency laparotomy<br>Pelvic stabilisation<br>Emergency craniotomy                                  |
| Neurosurgical operation<br>Thoracic operation<br>Abdominal operation<br>Pelvic operation<br>Reduction and external or internal fixation (all as indicated) |
| ICP catheter                                                                                                                                               |

S  
e  
c  
o  
n  
d  
a  
r  
y  
  
S  
u  
r  
v  
e  
y
